# Supplementary material for: Disposable platform provides visual and color-based point-of-care anemia self-testing
Source: JCI journal article supplement (doi:10.1172/jci76666), 2014-08-25
Supplement: sd3 [file 3]

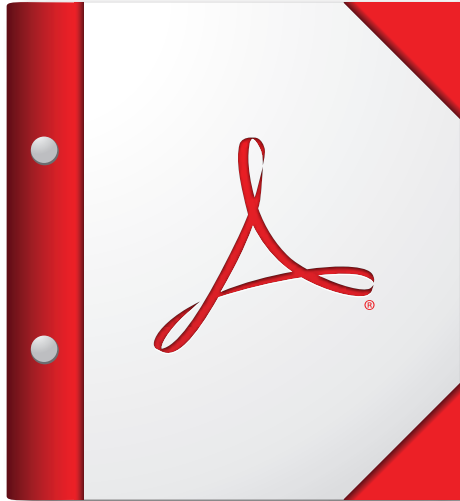

**For the best experience, open this PDF portfolio in  
Acrobat X or Adobe Reader X, or later.**

[Get Adobe Reader Now!](#)
